# Supplementary material for: Distinct Coastal Microbiome Populations Associated With Autochthonous- and Allochthonous-Like Dissolved Organic Matter
Source: Front Microbiol. 2019 Nov 7;10:2579. doi: 10.3389/fmicb.2019.02579 (PMC6854034; doi:10.3389/fmicb.2019.02579)
Supplement: Supplementary file 9 [file Table_4.XLSX]

## Sheet: Caption
Table S4
Shannon H’s index for alpha diversity per sample based on all OTUs. Samples were subsampled to the lowest sample size (2821 reads) and bootstrapped 100 times before analysis.

## Sheet: Table S4
Samples[station]	Shannon H (based on all OTUs) sub-sampling to lowest sample size and 100 x bootstrap
Marine[1] 1 m 2014-06-11	4.59277
Marine[1] 1 m 2014-07-02	5.64342
Marine[1] 1 m 2014-07-15	5.18266
Marine[1] 1 m 2014-08-05	5.08355
Marine[1] 1 m 2014-10-02	5.4159
Marine[1] 1 m 2014-10-23	5.91292
Marine[1] 1 m 2014-11-18	6.00985
Marine[1] 4 m 2014-06-11	4.85956
Marine[1] 4 m 2014-07-02	5.53195
Marine[1] 4 m 2014-08-05	4.74873
Marine[1] 4 m 2014-10-02	5.70124
Marine[1] 4 m 2014-10-23	5.92456
Marine[2] 1 m 2014-06-10	5.51355
Marine[2] 1 m 2014-07-03	4.72265
Marine[2] 1 m 2014-07-16	5.33949
Marine[2] 1 m 2014-08-06	4.41607
Marine[2] 1 m 2014-08-26	4.4128
Marine[2] 1 m 2014-10-22	6.12168
Marine[2] 1 m R1 2014-10-01	5.143
Marine[2] 1 m R2 2014-10-01	6.02319
Marine[2] 1 m 2014-11-20	7.83616
Marine[2] 4 m 2014-06-10	5.79654
Marine[2] 4 m 2014-07-03	4.87312
Marine[2] 4 m 2014-08-06	4.90456
Marine[2] 4 m 2014-08-26	4.3708
Marine[2] 4 m 2014-10-01	5.60763
Marine[2] 4 m 2014-10-22	6.49899
Marine[2] 4 m 2014-11-20	7.02896
Marine[3] 1 m 2014-06-10	5.72892
Marine[3] 1 m 2014-07-03	5.78856
Marine[3] 1 m 2014-07-16	5.30599
Marine[3] 1 m 2014-08-06	5.48074
Marine[3] 1 m 2014-08-26	5.92059
Marine[3] 1 m 2014-10-22	6.52109
Marine[3] 1 m R1 2014-10-01	7.24218
Marine[3] 1 m R2 2014-10-01	5.81161
Marine[3] 1 m 2014-11-20	7.193
Marine[3] 4 m 2014-06-10	5.74434
Marine[3] 4 m 2014-07-03	5.74661
Marine[3] 4 m 2014-08-06	4.24895
Marine[3] 4 m 2014-08-26	5.94419
Marine[3] 4 m 2014-10-01	5.88502
Marine[3] 4 m 2014-10-22	6.73776
Marine[3] 4 m 2014-11-20	6.98273
Stream[1] 2014-06-11	6.63953
Stream[1] 2014-07-02	7.84672
Stream[1] 2014-07-15	6.71432
Stream[1] 2014-08-05	3.8607
Stream[1] 2014-10-02	5.97462
Stream[1] 2014-10-22	6.66645
Stream[1] 2014-11-20	6.77851
Stream[2] 2014-06-11	7.33386
Stream[2] 2014-07-02	6.62097
Stream[2] 2014-07-15	5.48545
Stream[2] 2014-08-05	5.51328
Stream[2] 2014-10-02	6.9779
Stream[2] 2014-10-22	7.48571
Stream[2] 2014-11-20	7.7113
Stream[3] 2014-06-10	4.95963
Stream[3] 2014-07-03	4.25521
Stream[3] 2014-08-06	6.00511
Stream[3] 2014-08-26	5.97132
Stream[3] 2014-10-01	7.04024
Stream[3] 2014-10-22	7.93351
Stream[3] 2014-11-20	7.79775
Stream[4] 2014-06-10	4.85134
Stream[4] 2014-07-03	4.67109
Stream[4] 2014-07-16	6.36793
Stream[4] 2014-08-06	6.39022
Stream[5] 2014-08-26	5.86811
Stream[5] 2014-10-01	6.28643
Stream[5] 2014-10-22	5.68188
Stream[5] 2014-11-20	7.633
Legend:
R = Replicate
Location ID	Name
Marine[1]	Inner fjord buoy (St. 60)
Marine[2]	Outer fjord buoy
Marine[3]	Boundary station at Isefjord mouth
Stream[1]	Boserup
Stream[2]	Lejre
Stream[3]	Havelse
Stream[4]	Langsø
Stream[5]	Værebro
